# Supplementary material for: Dose-response relationship between exercise and cognitive function in older adults with and without cognitive impairment: A systematic review and meta-analysis
Source: PubMed Central journal article supplement (PMC6328108; doi:10.1371/journal.pone.0210036), 2019-01-10

S1 Fig. Funnel plot.

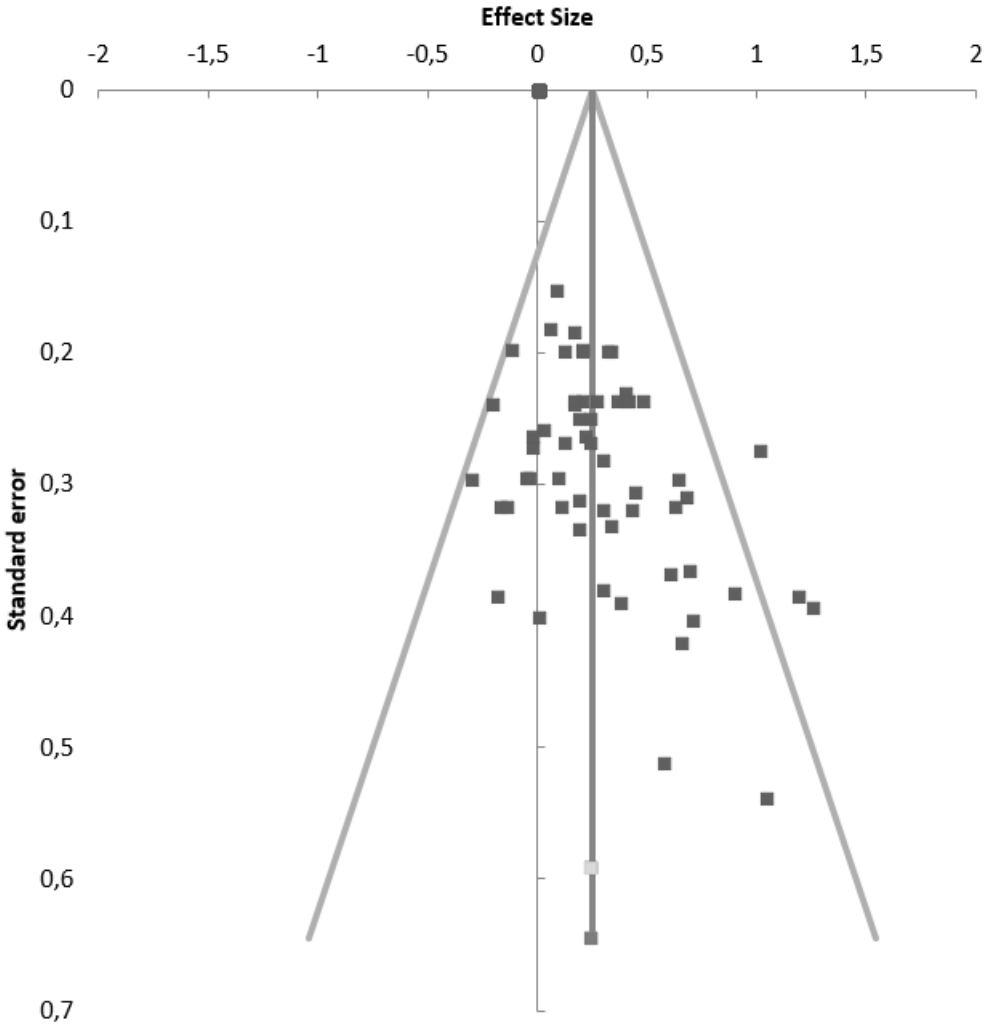

Supplement: pone.0210036.s002.pdf [file pone.0210036.s002.pdf]
