# Supplementary material for: Dose-response relationship between exercise and cognitive function in older adults with and without cognitive impairment: A systematic review and meta-analysis
Source: PubMed Central journal article supplement (PMC6328108; doi:10.1371/journal.pone.0210036), 2019-01-10
Supplement: pone.0210036.s003.pdf [file pone.0210036.s003.pdf]

**S1 Table. Nonspecific search terms.**

|                  | <b>Variable</b>                                  | <b>Terms</b>                                                                                                                                                                                                                                                                                 |
|------------------|--------------------------------------------------|----------------------------------------------------------------------------------------------------------------------------------------------------------------------------------------------------------------------------------------------------------------------------------------------|
| <b>Inclusion</b> | Activity                                         | (exercis* OR physical activit*)                                                                                                                                                                                                                                                              |
|                  | Training type                                    | (aerobic OR endurance OR anaerobic OR resistance OR strength OR power OR physical OR balance OR psychomotor) AND training                                                                                                                                                                    |
|                  | Cognitive outcome                                | (cognit* OR cognitive function* OR cognitive performance OR memory OR memory performance OR executive function OR executive process* OR STROOP OR attention OR neurocognit*)                                                                                                                 |
|                  | Study design                                     | (randomised controlled trial OR rct OR controlled)                                                                                                                                                                                                                                           |
| <b>Exclusion</b> | Children or adolescents                          | (child* OR children OR youth)                                                                                                                                                                                                                                                                |
|                  | Patient population other than MCI, VCI, dementia | (Parkinson OR MS OR multiple sclerosis OR stroke OR fibromyalgia OR huntington OR cancer OR copd OR asthma OR infarct* OR myocardial infarct* OR schizophrenia OR chronic fatigue syndrome OR diabetes OR retardation OR knee OR knee osteoarthritis OR back pain OR heart failure OR obese) |
|                  | Protocol papers                                  | (study protocol OR protocol OR rationale OR design)                                                                                                                                                                                                                                          |
|                  | Virtual designs                                  | (virtual)                                                                                                                                                                                                                                                                                    |
