# Supplementary material for: Dose-response relationship between exercise and cognitive function in older adults with and without cognitive impairment: A systematic review and meta-analysis
Source: PubMed Central journal article supplement (PMC6328108; doi:10.1371/journal.pone.0210036), 2019-01-10
Supplement: pone.0210036.s004.pdf [file pone.0210036.s004.pdf]

**S2 Table. Outcome values for studies with healthy old adults.**

| Author, year               | Intervention type (ar/an/mc/pm) <sup>a</sup> | Total exercise duration (min) | Outcome variables                                                                                                                                                                            | Effect domain <sup>b</sup> | Effect size | PEDro score |
|----------------------------|----------------------------------------------|-------------------------------|----------------------------------------------------------------------------------------------------------------------------------------------------------------------------------------------|----------------------------|-------------|-------------|
| Albinet et al., 2010       | ar                                           | 2160                          | Wisconsin Card Sorting Task                                                                                                                                                                  | EF                         | 0,65        | 4           |
| Albinet et al., 2016       | ar                                           | 2520                          | STROOP task; Random Number Generation task; Hayling task; Spatial Running Span task; Verbal Running Span task; 2-back task; Dimension-switching task; Plus-Minus task; Digit-Letter Task     | EF                         | 0,19        | 5           |
| Ansai & Rebelatto, 2015    | mc                                           | 2880                          | Montreal Cognitive Assessment                                                                                                                                                                | GC                         | 0,09        | 7           |
|                            | an                                           | 2880                          | Montreal Cognitive Assessment                                                                                                                                                                | GC                         | -0,31       |             |
| Best et al., 2015          | an                                           | 3120                          | Latent memory score                                                                                                                                                                          | EF                         | -0,12       | 7           |
|                            | an                                           | 6240                          | Latent executive function score                                                                                                                                                              | EF                         | 0,20        |             |
| Coetsee & Terblanche, 2017 | an                                           | 6240                          | Latent memory score                                                                                                                                                                          | Mem                        | 0,32        | 5           |
|                            | an                                           | 6240                          | Latent executive function score                                                                                                                                                              | EF                         | 0,20        |             |
| Dao et al., 2013           | ar                                           | 1440                          | STROOP basic, incongruent and interference                                                                                                                                                   | EF                         | -0,31       | 3           |
|                            | ar                                           | 2256                          | STROOP basic, incongruent and interference                                                                                                                                                   | EF                         | -0,19       |             |
| Fabre et al., 2002         | an                                           | 1440                          | STROOP basic, incongruent and interference                                                                                                                                                   | EF                         | 0,19        | 5           |
|                            | an                                           | 3120                          | STROOP interference                                                                                                                                                                          | EF                         | 0,40        |             |
| Ferreira et al., 2015      | an                                           | 6240                          | STROOP interference                                                                                                                                                                          | EF                         | 0,40        | 5           |
|                            | ar                                           | 960                           | Wechsler Memory Scale: total score; Paired associate learning; Logic Memory Immediate Recall; Orientation; General Information; Mental Control; Visual Reproductions                         | Mem                        | 0,58        |             |
| Iuliano et al., 2015       | ar                                           | 3960                          | Digit Span Forward                                                                                                                                                                           | EF                         | 1,05        | 4           |
|                            | ar                                           | 3960                          | Wechsler Memory Scale, Logic Memory 1 + 2                                                                                                                                                    | Mem                        | 0,45        |             |
|                            |                                              |                               | WAIS, vocabulary + information + symbol search; Digit Span Forward + Backward; Corsi Block Test Forward + Backward; Wisconsin Card Sorting Task, number of categories + perseverative errors | EF                         | 0,68        |             |
|                            |                                              |                               | Attentive Matrices Test; Raven's Progressive Matrices Tests; STROOP; Trail Making Test A + B; Drawing Copy Test, copy with elements                                                          | EF                         | 0,30        |             |

|                          |    |      |                                                                                                                                                                                                                        |           |               |   |
|--------------------------|----|------|------------------------------------------------------------------------------------------------------------------------------------------------------------------------------------------------------------------------|-----------|---------------|---|
|                          | ar | 1080 | Attentive Matrices Test; Raven's Progressive Matrices Tests; STROOP; Trail Making Test A + B; Drawing Copy Test, copy with elements                                                                                    | EF        | 0,43          |   |
|                          | pm | 1440 | Attentive Matrices Test; Raven's Progressive Matrices Tests; STROOP; Trail Making Test A + B; Drawing Copy Test, copy with elements                                                                                    | EF        | 0,11          |   |
| Jonasson et al., 2017    | ar | 3240 | Word recognition; Free recall, Paired associates<br>D-KEFS Trail Making Test 2+3; Digit Symbol task; Letter comparison; Letter memory; N-back; Keep track; Automated operation span; Flanker task; Backward Digit Span | Mem<br>EF | 0,42<br>0,29  | 5 |
| Kimura et al., 2010      | an | 2160 | Task-switching Test                                                                                                                                                                                                    | EF        | 0,16          | 4 |
| Liu-Ambrose et al., 2010 | an | 3120 | STROOP; Trail Making Test A + B; Digit Span                                                                                                                                                                            | EF        | 0,21          | 7 |
|                          | an | 6240 | STROOP; Trail Making Test A + B; Digit Span                                                                                                                                                                            | EF        | 0,13          |   |
| Liu-Ambrose et al., 2012 | an | 3120 | Flanker task                                                                                                                                                                                                           | EF        | 0,34          | 6 |
|                          | an | 6240 | Flanker task                                                                                                                                                                                                           | EF        | 1,18          |   |
| Maass et al., 2015       | ar | 1440 | Verbal Learning and Memory Test early recall, late recall, recognition; Complex figure test early recall; late recall; recognition                                                                                     | Mem       | -0,14         | 5 |
| Madden et al., 1989      | ar | 2880 | Word comparison reaction time task<br>Letter search reaction time task                                                                                                                                                 | Mem<br>EF | -0,03<br>0,30 | 5 |
| Muscari et al., 2010     | ar | 9360 | Mini Mental State Examination                                                                                                                                                                                          | GC        | 0,06          | 7 |
| Nouchi et al., 2013      | mc | 360  | Verbal fluency task, letterfluency + category fluency; Adapted STROOP task + reverse; Digit Span Forward + Backward; Digit cancellation task; Digit symbol coding; Symbol search                                       | EF        | 0,25          | 8 |
|                          |    |      | Logical memory; First and second names                                                                                                                                                                                 | Mem       | 0,19          |   |
| Ruscheweyh et al., 2011  | ar | 4800 | Auditory Verbal Learning Test recall                                                                                                                                                                                   | Mem       | 0,19          | 5 |
|                          | pm | 4800 | Auditory Verbal Learning Test recall                                                                                                                                                                                   | Mem       | 0,63          |   |
| Shatil et al., 2013      | mc | 2160 | CogniFIT                                                                                                                                                                                                               | GC        | 0,03          | 4 |
| Tsai et al., 2015        | an | 9360 | Oddball task                                                                                                                                                                                                           | EF        | 0,65          | 7 |
| Tsai et al., 2017        | ar | 2880 | Mini Mental State Examination                                                                                                                                                                                          | GC        | 0,37          | 6 |
| Tsutsumi et al., 1997    | an | 972  | Mental arithmetic task; Computerized mirror drawing task time + distance + errors                                                                                                                                      | EF        | 0,38          | 5 |
|                          | an | 1692 | Mental arithmetic task; Computerized mirror drawing task time + distance + errors                                                                                                                                      | EF        | 0,30          |   |

|                        |    |      |                                                                                |           |              |   |
|------------------------|----|------|--------------------------------------------------------------------------------|-----------|--------------|---|
| Vedovelli et al., 2017 | mc | 2160 | Digit Span Forward + Backward; Logical Memory 1+2<br>Trail Making Test; STROOP | Mem<br>EF | 1,11<br>1,14 | 5 |
|------------------------|----|------|--------------------------------------------------------------------------------|-----------|--------------|---|

---

Effect sizes are averages of test-specific effect sizes. <sup>a</sup>ar = aerobic; an = anaerobic; mc = multi-component; pm = psychomotor. <sup>b</sup>GC = global cognition; EF = executive function, Mem = memory.
