# Supplementary material for: Dose-response relationship between exercise and cognitive function in older adults with and without cognitive impairment: A systematic review and meta-analysis
Source: PubMed Central journal article supplement (PMC6328108; doi:10.1371/journal.pone.0210036), 2019-01-10
Supplement: pone.0210036.s005.pdf [file pone.0210036.s005.pdf]

**S3 Table. Outcome variables for studies with older adults with cognitive impairments.**

| Author, year                  | Intervention type (ar/an/mc/pm) <sup>a</sup> | Total exercise duration (min)                                                                                                    | Outcome variables                                                                                                                                 | Effect domain <sup>b</sup> | Effect size | PEDro score |
|-------------------------------|----------------------------------------------|----------------------------------------------------------------------------------------------------------------------------------|---------------------------------------------------------------------------------------------------------------------------------------------------|----------------------------|-------------|-------------|
| Baker et al., 2010            | ar                                           | 5040                                                                                                                             | Trail Making Test B; STROOP task; Task Switching; Verbal Fluency; Symbol Digit Modalities                                                         | EF                         | 0,71        | 6           |
| Bossers et al., 2015          | mc                                           | 1080                                                                                                                             | Mini Mental State Examination                                                                                                                     | GC                         | 0,48        | 6           |
|                               |                                              |                                                                                                                                  | Eight-words Test recall + recognition, Digit Span Forward; Visual Memory Span Forward, Rivermead Face + Picture Recognition Test                  | Mem                        | 0,42        |             |
|                               |                                              |                                                                                                                                  | Visual Memory Span Backward, Digit Span Backward, STROOP, Verbal Fluency, GIT Picture Completion Test, Trail Making Test A                        | EF                         | 0,37        |             |
|                               | ar                                           | 1080                                                                                                                             | Mini Mental State Examination                                                                                                                     | GC                         | 0,21        |             |
|                               |                                              | Eight-words Test recall + recognition, Digit Span Forward; Visual Memory Span Forward, Rivermead Face + Picture Recognition Test | Mem                                                                                                                                               | 0,28                       |             |             |
|                               |                                              | Visual Memory Span Backward, Digit Span Backward, STROOP, Verbal Fluency, GIT Picture Completion Test, Trail Making Test A       | EF                                                                                                                                                | 0,17                       |             |             |
| De Souto Barreto et al., 2017 | mc                                           | 2880                                                                                                                             | Mini Mental State Examination                                                                                                                     | GC                         | -0,08       | 7           |
| Ten Brinke et al., 2015       | ar                                           | 3120                                                                                                                             | Rey Auditory Verbal Learning Test, total acquisition + recall after interference + loss after interference + long delay free recall + recognition | Mem                        | -0,18       | 7           |
|                               | an                                           | 3120                                                                                                                             | Rey Auditory Verbal Learning Test, total acquisition + recall after interference + loss after interference + long delay free recall + recognition | Mem                        | 0,00        |             |
| Davis et al., 2013            | ar                                           | 2880                                                                                                                             | STROOP interference                                                                                                                               | EF                         | 0,21        | 6           |
|                               | an                                           | 2880                                                                                                                             | STROOP interference                                                                                                                               | EF                         | 0,24        |             |
| Kemoun et al., 2010           | mc                                           | 2700                                                                                                                             | ERFC (Rapid Evaluation of Cognitive Function)                                                                                                     | GC                         | 1,25        | 4           |
| Kwak et al., 2006             | an                                           | 4550                                                                                                                             | Mini Mental State Examination                                                                                                                     | GC                         | 0,89        | 5           |
| Liu-Ambrose et al., 2016      | ar                                           | 4320                                                                                                                             | ADAS-COG                                                                                                                                          | GC                         | 0,16        | 7           |
|                               |                                              |                                                                                                                                  | Trail Making Test; STROOP interference                                                                                                            | EF                         | -0,21       |             |
| Nagamatsu et al., 2013        | ar                                           | 3120                                                                                                                             | Rey Auditory Verbal Learning Test, total acquisition + recall after interference + loss after interference + long delay free                      | Mem                        | -0,02       | 7           |

|                       |    |      |                                                                                                                                                                                                                                                                                                                                                                 |     |       |   |
|-----------------------|----|------|-----------------------------------------------------------------------------------------------------------------------------------------------------------------------------------------------------------------------------------------------------------------------------------------------------------------------------------------------------------------|-----|-------|---|
|                       | an | 3120 | recall Computerized spatial memory task, one + two + three item reaction time / accuracy + choice reaction time<br>Rey Auditory Verbal Learning Test, total acquisition + recall after interference + loss after interference + long delay free recall Computerized spatial memory task, one + two + three item reaction time / accuracy + choice reaction time | Mem | 0,13  |   |
| Ruiz et al., 2015     | mc | 1020 | Mini Mental State Examination                                                                                                                                                                                                                                                                                                                                   | GC  | -0,17 | 7 |
| Telenius et al., 2015 | mc | 1320 | Mini Mental State Examination                                                                                                                                                                                                                                                                                                                                   | GC  | 0,09  | 8 |
| Varela et al., 2011   | ar | 1080 | Mini Mental State Examination                                                                                                                                                                                                                                                                                                                                   | GC  | 0,69  | 6 |
|                       | ar | 1080 | Mini Mental State Examination                                                                                                                                                                                                                                                                                                                                   | GC  | 0,61  |   |
| Wei & Ji, 2014        | mc | 3600 | Mini Mental State Examination                                                                                                                                                                                                                                                                                                                                   | GC  | 1,02  | 5 |

Effect sizes are averages of test-specific effect sizes. <sup>a</sup>ar = aerobic; an = anaerobic; mc = multi-component; pm = psychomotor. <sup>b</sup>GC = global cognition; EF = executive function, Mem = memory.
