# Supplementary material for: Dose-response relationship between exercise and cognitive function in older adults with and without cognitive impairment: A systematic review and meta-analysis
Source: PubMed Central journal article supplement (PMC6328108; doi:10.1371/journal.pone.0210036), 2019-01-10
Supplement: pone.0210036.s006.pdf [file pone.0210036.s006.pdf]

**S4 Table. Weighted<sup>a</sup> correlations between dose-parameters and sociodemographic factors for healthy older adults.**

|                                   | <b>Age</b> | <b>MMSE</b> | <b>Program duration</b> | <b>Session duration</b> | <b>Frequency</b> | <b>Total exercise duration</b> |
|-----------------------------------|------------|-------------|-------------------------|-------------------------|------------------|--------------------------------|
| Age                               | .          | -0.48       | -0.05                   | 0.32                    | 0.05             | 0.05                           |
| MMSE                              | .          | .           | 0.27                    | 0.06                    | -0.26            | 0.14                           |
| Program duration (weeks)          | .          | .           | .                       | 0.50                    | -0.69            | 0.81                           |
| Session duration (minutes)        | .          | .           | .                       | .                       | -0.54            | 0.54                           |
| Frequency (#/week)                | .          | .           | .                       | .                       | .                | -0.24                          |
| Total exercise duration (minutes) | .          | .           | .                       | .                       | .                | .                              |

<sup>a</sup>Correlations weighted for n per study.
