# Supplementary material for: Dose-response relationship between exercise and cognitive function in older adults with and without cognitive impairment: A systematic review and meta-analysis
Source: PubMed Central journal article supplement (PMC6328108; doi:10.1371/journal.pone.0210036), 2019-01-10
Supplement: pone.0210036.s008.pdf [file pone.0210036.s008.pdf]

**S6 Table. Omnibus tests for the moderator analyses for healthy older adults and older adults with cognitive impairments.**

|                                   | <b>Healthy</b>         | <b>Cognitive impairments</b> |
|-----------------------------------|------------------------|------------------------------|
| Cognitive domain                  | F(2,129)=0.313, p>0.05 | F(2,51)=2.050, p>0.05        |
| Exercise type                     | F(3,128)=0.081, p>0.05 | F(2,51)=0.432, p>0.05        |
| Program duration (weeks)          | F(2,129)=1.487, p>0.05 | F(2,51)=1.259, p>0.05        |
| Session duration (minutes)        | F(2,129)=0.905, p>0.05 | F(2,51)=5.756, p≤0.01**      |
| Frequency (#week)                 | F(3,128)=0.283, p>0.05 | F(2,51)=3.589, p≤0.05*       |
| Total exercise duration (minutes) | F(1,130)=0.365, p>0.05 | F(1,52)=0.000, p>0.05        |
| Intensity <sup>ab</sup>           |                        |                              |
| Aerobic exercise <sup>b</sup>     | F(2,50)=1.784, p>0.05  | F(1,25)=1.967, p>0.05        |
| Anaerobic exercise <sup>a</sup>   | F(2,35)=0.220, p>0.05  | -                            |
| Multimodal exercise <sup>a</sup>  | F(2,31)=0.093, p>0.05  | F(2,6)=0.845, p>0.05         |
| Psychomotor exercise <sup>b</sup> | -                      | -                            |

<sup>a</sup>a.u. = arbitrary unit. <sup>b</sup>%HRR/HRmax/VO2max. \*significant from 0 at p≤0.05; \*\*significant from 0 at p≤0.01.
