# Supplementary material for: Dose-response relationship between exercise and cognitive function in older adults with and without cognitive impairment: A systematic review and meta-analysis
Source: PubMed Central journal article supplement (PMC6328108; doi:10.1371/journal.pone.0210036), 2019-01-10
Supplement: pone.0210036.s009.pdf [file pone.0210036.s009.pdf]

**S7 Table. Verification of cognitive status and years of education.**

| Author, year               | Population | Verification of cognitive status or syndrome                                                | Years of education (mean±SD) intervention / control                     |
|----------------------------|------------|---------------------------------------------------------------------------------------------|-------------------------------------------------------------------------|
| Albinet et al., 2010       | Healthy    | Inclusion criterium: MMSE <sup>a</sup> >26                                                  | 11.3±4.6 / 12.8±3.3                                                     |
| Albinet et al., 2016       | Healthy    | Inclusion criterium: MMSE <sup>a</sup> >26                                                  | 11.9±3.9 / 11.6±2.1                                                     |
| Ansai & Rebelatto, 2015    | Healthy    | Exclusion criterium: MMSE <sup>a</sup> below cut-off designated by educational level – 1 SD | Other                                                                   |
|                            |            |                                                                                             |                                                                         |
| Best et al., 2015          | Healthy    | Not specified                                                                               | Other                                                                   |
| Coetsee & Terblanche, 2017 | Healthy    | Exclusion criterium: MoCA <sup>b</sup> <26                                                  | Not specified                                                           |
| Dao et al., 2013           | Healthy    | Inclusion criterium: MMSE <sup>a</sup> ≥24                                                  | Not specified                                                           |
| Fabre et al., 2002         | Healthy    | Not specified                                                                               | 11.2±1.3 / 12.1±1.4                                                     |
| Ferreira et al., 2015      | Healthy    | Inclusion criterium: no mild cognitive impairment or diagnosis of dementia                  | 12.9±2.7 / 12.9±2.5                                                     |
| Iuliano et al., 2015       | Healthy    | Inclusion criterium: absence of dementia                                                    | 12.4±3.45 / 12.3±4.30<br>11.1±4.18 / 12.3±4.30<br>11.3±3.88 / 12.3±4.30 |
| Jonasson et al., 2017      | Healthy    | Exclusion criterium: MoCA <sup>b</sup> <27                                                  | Not specified                                                           |
| Kimura et al., 2010        | Healthy    | Exclusion criterium: diagnosis of dementia by a medical doctor                              | Not specified                                                           |
| Liu-Ambrose et al., 2010   | Healthy    | Inclusion criterium: MMSE <sup>a</sup> ≥24                                                  | Other                                                                   |
| Liu-Ambrose et al., 2012   | Healthy    | Inclusion criterium: MMSE <sup>a</sup> ≥24                                                  | Other                                                                   |
| Maass et al., 2015         | Healthy    | Exclusion criterium: MMSE <sup>a</sup> ≤27                                                  | Not specified                                                           |

|                               |              |                                                                                                                                                                                                           |                                                |
|-------------------------------|--------------|-----------------------------------------------------------------------------------------------------------------------------------------------------------------------------------------------------------|------------------------------------------------|
| Madden et al., 1989           | Healthy      | Unspecified                                                                                                                                                                                               | 15.1±2.06 / 14.9±2.97<br>15.7±2.54 / 14.9±2.97 |
| Muscari et al., 2010          | Healthy      | Exclusion criterium: MMSE <sup>a</sup> <24                                                                                                                                                                | Other                                          |
| Nouchi et al., 2013           | Healthy      | Unspecified                                                                                                                                                                                               | 13.4±1.85 / 13.2±1.96                          |
| Ruscheweyh et al., 2011       | Healthy      | Exclusion criterium: presence of dementia defined as MMSE <sup>a</sup> <26                                                                                                                                | 10.5±2.8 / 11.0±4.1<br>11.0±2.6 / 11.0±4.1     |
| Shatil et al., 2013           | Healthy      | Exclusion criterium: MMSE <sup>a</sup> ≤23                                                                                                                                                                | Other                                          |
| Tsai et al., 2015             | Healthy      | Exclusion criterium: MMSE <sup>a</sup> ≤26                                                                                                                                                                | 6.6±2.50 / 6.8±2.71                            |
| Tsai et al., 2017             | Healthy      | Exclusion criterium: MMSE <sup>a</sup> ≤26                                                                                                                                                                | 12.6±2.97 / 10.6±3.20                          |
| Tsutsumi et al., 1997         | Healthy      | Unspecified                                                                                                                                                                                               | Not specified                                  |
| Vedovelli et al., 2017        | Healthy      | Exclusion criterium: presence of neurodegenerative diseases; cutoff values for the Brazilian MMSE <sup>a</sup> <18 for middle educational level and <26 for high educational level                        | 7.4±3.39 / 10.1±3.82                           |
| Baker et al., 2010            | Amnesic MCI  | Inclusion criterium: amnesic MCI diagnosis (single or multiple domain) using Petersen criteria                                                                                                            | Not specified                                  |
| Bossers et al., 2015          | Dementia     | Inclusion criterium: diagnosis of dementia reported in the patient's medical file or a medical specialist                                                                                                 | Other                                          |
| Ten Brinke et al., 2015       | Probable MCI | Inclusion criteria: MMSE <sup>a</sup> ≥24; MoCA <sup>b</sup> <26; answered "yes" to the question "Do you have any difficulty with your memory?"                                                           | Other                                          |
| Davis et al., 2013            | Probable MCI | Inclusion criteria: MoCA <sup>b</sup> <26; presence of subjective memory complaints                                                                                                                       | Not specified                                  |
| De Souto Barreto et al., 2017 | Dementia     | Inclusion criteria: diagnosis of Alzheimer's disease or vascular or mixed dementia according to the Diagnostic and Statistical Manual of Mental Disorders, Fourth Edition (DSM-IV); MMSE <sup>a</sup> ≤20 | Other                                          |
| Kemoun et al., 2010           | Dementia     | Inclusion criteria: diagnosis of Alzheimer-type dementia by a neurologist according to the Diagnostic and Statistical Manual of Mental Disorders, Fourth Edition (DSM IV) criteria; MMSE <sup>a</sup> <23 | Not specified                                  |

|                          |                                     |                                                                                                                                                                                                                   |               |
|--------------------------|-------------------------------------|-------------------------------------------------------------------------------------------------------------------------------------------------------------------------------------------------------------------|---------------|
| Kwak et al., 2006        | Dementia                            | Inclusion criterium: MMSE <sup>a</sup> 10-26                                                                                                                                                                      | Not specified |
| Liu-Ambrose et al., 2016 | VCI                                 | Inclusion criterium: clinical diagnosis of VCI based on the presence of small vessel ischemic disease and cognitive syndrome                                                                                      | Other         |
| Nagamatsu et al., 2013   | Probable MCI                        | Inclusion criteria: MMSE <sup>a</sup> ≥24; MoCA <sup>b</sup> <26; answered “yes” to the question “Do you have any difficulty with your memory?”                                                                   | Other         |
| Ruiz et al., 2015        | Cognitive impairments (unspecified) | Only ‘severe dementia’ is an exclusion criteria. However baseline MMSE <sup>a</sup> is 16.4(control)/18.5(intervention), which is indicative of the presence of cognitive impairments                             | Not specified |
| Telenius et al., 2015    | Dementia                            | Inclusion criteria: having dementia of mild or moderate degree as measured by the Clinical Dementia Rating scale (CDR 1 or 2)                                                                                     | Not specified |
| Varela et al., 2011      | MCI                                 | Inclusion criterium: confirmed clinical diagnosis of mild cognitive impairment according to the consensus of the Spanish Society of Geriatrics and Gerontology                                                    | Not specified |
| Wei & Ji, 2014           | MCI                                 | Inclusion criterium: diagnosis of MCI according to the Diagnostic and Statistical Manual of Mental Disorders, Fourth Edition (DSM IV) criteria; MMSE <sup>a</sup> ≤26; Global Deterioration Scale (GDS) score 2-3 | Other         |

<sup>a</sup>Mini-Mental State Examination. <sup>b</sup>Montreal Cognitive Assessment.
