# Supplementary material for: Dose-response relationship between exercise and cognitive function in older adults with and without cognitive impairment: A systematic review and meta-analysis
Source: PLoS One. 2019 Jan 10;14(1):e0210036. doi: 10.1371/journal.pone.0210036 (PMC6328108; doi:10.1371/journal.pone.0210036)
Supplement: S5 Table — (PDF) [file pone.0210036.s007.pdf]

**S5 Table. Weighted<sup>a</sup> correlations between dose-parameters and sociodemographic factors for older adults with cognitive impairments.**

|                                      | <b>Age</b> | <b>MMSE</b> | <b>Program<br/>duration</b> | <b>Session<br/>duration</b> | <b>Frequency</b> | <b>Total exercise<br/>duration</b> |
|--------------------------------------|------------|-------------|-----------------------------|-----------------------------|------------------|------------------------------------|
| Age                                  | .          | -0.92       | -0.76                       | -0.58                       | 0.38             | -0.82                              |
| MMSE                                 | .          | .           | 0.71                        | 0.69                        | -0.55            | 0.74                               |
| Program duration<br>(weeks)          | .          | .           | .                           | 0.73                        | -0.67            | 0.90                               |
| Session duration<br>(minutes)        | .          | .           | .                           | .                           | -0.90            | 0.73                               |
| Frequency (#/week)                   | .          | .           | .                           | .                           | .                | -0.48**                            |
| Total exercise duration<br>(minutes) | .          | .           | .                           | .                           | .                | .                                  |

<sup>a</sup>Correlations weighted for n per study.
